# Supplementary material for: A Wheat TaTOE1-B1 Transcript TaTOE1-B1-3 Can Delay the Flowering Time of Transgenic Arabidopsis
Source: MDPI journal article supplement (doi:10.3390/ijms222312645), 2021-11-23
Supplement: s1 [file s1]

|             |                                                                                                         |      |
|-------------|---------------------------------------------------------------------------------------------------------|------|
| TaTOE1-B1-1 | ATGGAGCTGGATCTGAACGTGGAGGAGAAGCCGCGCGCGTGGCGCGAGGAGCATCCGGGACGTCGGAGTCGTCGGTGCTGAACCGGAGGCGCTCTGCG      | 100  |
| TaTOE1-B1-2 | ATGGAGCTGGATCTGAACGTGGAGGAGAAGCCGCGCGCGTGGCGCGAGGAGCATCCGGGACGTCGGAGTCGTCGGTGCTGAACCGGAGGCGCTCTGCG      | 100  |
| TaTOE1-B1-3 | ATGGAGCTGGATCTGAACGTGGAGGAGAAGCCGCGCGCGTGGCGCGAGGAGCATCCGGGACGTCGGAGTCGTCGGTGCTGAACCGGAGGCGCTCTGCG      | 100  |
| Consensus   | atggagctggatctgaacgtggaggagaagccgcgcgcggtggcgcgagagcactccgggacgtggagtcgtcgtgtgctaacgaggagcgctcctgcg     |      |
| TaTOE1-B1-1 | GCGGGGGCGCGCGCGCGCGAGGAGGCTCCAGCTCGACGCGCGAGCGCGCGCGCGCGCGCGCGCGGTCGTCGAGTTCAGCATCTGAGGAGCTCGGG         | 200  |
| TaTOE1-B1-2 | GCGGGGGCGCGCGCGCGCGAGGAGGCTCCAGCTCGACGCGCGAGCGCGCGCGCGCGCGCGCGCGCGGTCGTCGAGTTCAGCATCTGAGGAGCTCGGG       | 200  |
| TaTOE1-B1-3 | GCGGGGGCGCGCGCGCGCGAGGAGGCTCCAGCTCGACGCGCGAGCGCGCGCGCGCGCGCGCGCGGTCGTCGAGTTCAGCATCTGAGGAGCTCGGG         | 200  |
| Consensus   | gcgggggcgcgcgcgcgcgaggaggcctccagctcgacgcgccagcggcgcgcgcgcgcgcgcggtgctcgaggttcagcatcctgaggagctcggc       |      |
| TaTOE1-B1-1 | GTCCGCCGAGGGCGAGAACGACGTCGCGCGCGACGACGACGAGGAGGAGGCCACTCCCTCGCCTCCACCTCCGCCGACGCGGCACCTACCCAGCACCTG     | 300  |
| TaTOE1-B1-2 | GTCCGCCGAGGGCGAGAACGACGTCGCGCGCGACGACGACGAGGAGGAGGCCACTCCCTCGCCTCCACCTCCGCCGACGCGGCACCTACCCAGCACCTG     | 300  |
| TaTOE1-B1-3 | GTCCGCCGAGGGCGAGAACGACGTCGCGCGCGACGACGACGAGGAGGAGGCCACTCCCTCGCCTCCACCTCCGCCGACGCGGCACCTACCCAGCACCTG     | 300  |
| Consensus   | gtccgccgaggggcgagaacgacgctcgcgcgccagcagcagcaggaggaggccactccctcgctccactccgcgacgcggcactaccaccagcactctg    |      |
| TaTOE1-B1-1 | CTGCAGCGCGCAACCACTCGTCACCCAAGAGCTGTTCCCGCGCGCGGCCACCGCGCGGTCGCGCGCGCATGTCCGTGCCGAGCATTGGGCCGAGCTCG      | 400  |
| TaTOE1-B1-2 | CTGCAGCGCGCAACCACTCGTCACCCAAGAGCTGTTCCCGCGCGCGGCCACCGCGCGGTCGCGCGCGCATGTCCGTGCCGAGCATTGGGCCGAGCTCG      | 400  |
| TaTOE1-B1-3 | CTGCAGCGCGCAACCACTCGTCACCCAAGAGCTGTTCCCGCGCGCGGCCACCGCGCGGTCGCGCGCGCATGTCCGTGCCGAGCATTGGGCCGAGCTCG      | 400  |
| Consensus   | ctgcagcgcgcaaccaactcgtcacccaagagctgttcccgcgcgcgccacccgcgcggttcgcgcgcgatgtccgtgctcgagcagcattggggcgagctcg |      |
| TaTOE1-B1-1 | GCTTCTTCGCGCGCGCGCGCGCTCCGACATGAGGATCCTGCAGATGCAGCAGCAGCTGCAGGTGCACGCGCAGCCCCGCGCGCGCGCGCGCG            | 500  |
| TaTOE1-B1-2 | GCTTCTTCGCGCGCGCGCGCGCTCCGACATGAGGATCCTGCAGATGCAGCAGCAGCTGCAGGTGCACGCGCAGCCCCGCGCGCGCGCGCGCG            | 500  |
| TaTOE1-B1-3 | GCTTCTTCGCGCGCGCGCGCGCTCCGACATGAGGATCCTGCAGATGCAGCAGCAGCTGCAGGTGCACGCGCAGCCCCGCGCGCGCGCGCGCG            | 500  |
| Consensus   | gcttcttccgcgcgcgcgcgcgctccggacatgagatccttcgagatgcagcagcagcagctgcaggtgcacgcgacgcccccgcgcgcgcgcgcg        |      |
| TaTOE1-B1-1 | CCAGCGCGCGGTGGCCAGAAGAGCGCGCGCGCGCGCTCCCGCAGCTCGCAGTACCGCGCGCTGACCTTCTACCGCGCACCGCGCGCTGGGAATCC         | 600  |
| TaTOE1-B1-2 | CCAGCGCGCGGTGGCCAGAAGAGCGCGCGCGCGCGCTCCCGCAGCTCGCAGTACCGCGCGCTGACCTTCTACCGCGCACCGCGCGCTGGGAATCC         | 600  |
| TaTOE1-B1-3 | CCAGCGCGCGGTGGCCAGAAGAGCGCGCGCGCGCGCTCCCGCAGCTCGCAGTACCGCGCGCTGACCTTCTACCGCGCACCGCGCGCTGGGAATCC         | 600  |
| Consensus   | ccagcgcgcggtggccaagaagagcgcgcgcgcgcgctcccgagctgcagatgacggcgctgacctctaccgcgacacggcgcgctgggaatcc          |      |
| TaTOE1-B1-1 | CATATCTGGGATTGCGGCAAGCAGGTGTACTTGGGTGGATTGACACTGCACATGCTGCTGCAAGGGCGTACGATCGAGCGGCGATCAAGTTCCGTGGCG     | 700  |
| TaTOE1-B1-2 | CATATCTGGGATTGCGGCAAGCAGGTGTACTTGGGTGGATTGACACTGCACATGCTGCTGCAAGGGCGTACGATCGAGCGGCGATCAAGTTCCGTGGCG     | 700  |
| TaTOE1-B1-3 | CATATCTGGGATTGCGGCAAGCAGGTGTACTTGGGTGGATTGACACTGCACATGCTGCTGCAAGGGCGTACGATCGAGCGGCGATCAAGTTCCGTGGCG     | 700  |
| Consensus   | catatctgggattgcgcgcaagcaggtgtacttgggtggatttgacctgcacatgctgctgcaaggcgctacgctgcagcgcgcgatcaagttccgtggcg   |      |
| TaTOE1-B1-1 | TCGACGCCGACATAAACTTCAACCTCAGCGGACTACGAGGACGACATGAAGCAGATGAAGGGGCTGTCCAAGGAGGAGTTCGTGCACGTGCTGCGCGGCA    | 800  |
| TaTOE1-B1-2 | TCGACGCCGACATAAACTTCAACCTCAGCGGACTACGAGGACGACATGAAGCAGATGAAGGGGCTGTCCAAGGAGGAGTTCGTGCACGTGCTGCGCGGCA    | 800  |
| TaTOE1-B1-3 | TCGACGCCGACATAAACTTCAACCTCAGCGGACTACGAGGACGACATGAAGCAGATGAAGGGGCTGTCCAAGGAGGAGTTCGTGCACGTGCTGCGCGGCA    | 800  |
| Consensus   | tcgacgccgacataaaacttcaacctcagcgactacgaggagacgatgaagcgatgaaggcgctgtccaaggaggagtctgtgcacgtgctgcgcgcgca    |      |
| TaTOE1-B1-1 | GAGCACCGGCTTCTCGCGGGGCGAGCTCCAAGTACAGAGGCGCTCACCTGCACAAGTGCGGCGGTTGGGAGGCGCGCATGGGCCAGTTCCTCGGCAAGAAG   | 900  |
| TaTOE1-B1-2 | GAGCACCGGCTTCTCGCGGGGCGAGCTCCAAGTACAGAGGCGCTCACCTGCACAAGTGCGGCGGTTGGGAGGCGCGCATGGGCCAGTTCCTCGGCAAGAAG   | 900  |
| TaTOE1-B1-3 | GAGCACCGGCTTCTCGCGGGGCGAGCTCCAAGTACAGAGGCGCTCACCTGCACAAGTGCGGCGGTTGGGAGGCGCGCATGGGCCAGTTCCTCGGCAAGAAG   | 900  |
| Consensus   | gagcacccgcttctcgcgggcgagctccaagtacagaggcgctcacctgcacaaagtgcggcggtggagcgcgcatggggcagcttccctgccaagaag     |      |
| TaTOE1-B1-1 | .....GCTTACGACAAGGCGGCGATCAAATGCAACGGTAGGGAGGCGGTGACGAACTTCG                                            | 1000 |
| TaTOE1-B1-2 | .....GCTTACGACAAGGCGGCGATCAAATGCAACGGTAGGGAGGCGGTGACGAACTTCG                                            | 955  |
| TaTOE1-B1-3 | .....GCTTACGACAAGGCGGCGATCAAATGCAACGGTAGGGAGGCGGTGACGAACTTCG                                            | 955  |
| Consensus   | gcttacgacaaggcgcgatcaaataagcaacgtagggagcggtgacgaacttcg                                                  |      |
| TaTOE1-B1-1 | AGCCGAGCACCTTATGATGCGGAGCTGCTCAGTGAGGTTGCTGCTGAAGGCGCAGATGTGCACCTCAACTTGAGCATATCTCAACCAACTTCACAAAGTCC   | 1100 |
| TaTOE1-B1-2 | AGCCGAGCACCTTATGATGCGGAGCTGCTCAGTGAGGTTGCTGCTGAAGGCGCAGATGTGCACCTCAACTTGAGCATATCTCAACCAACTTCACAAAGTCC   | 1055 |
| TaTOE1-B1-3 | AGCCGAGCACCTTATGATGCGGAGCTGCTCAGTGAGGTTGCTGCTGAAGGCGCAGATGTGCACCTCAACTTGAGCATATCTCAACCAACTTCACAAAGTCC   | 1055 |
| Consensus   | agccgagcacttatgatgcgagctgctcagttaggttgctgctgaaggcgagatgtgcacctcaacttgagcatatctcaaccaacttcacaaagtcc      |      |
| TaTOE1-B1-1 | CAAAAGGGATAAGAGCAGCCTTGGCCTGCAACTCCACCATGGATCATATGAAGGCTCTGAAGTAAAGAGACCAAAGGTCGATGCGCCCCCTGAGATGGTC    | 1200 |
| TaTOE1-B1-2 | CAAAAGGGATAAGAGCAGCCTTGGCCTGCAACTCCACCATGGATCATATGAAGGCTCTGAAGTAAAGAGACCAAAGGTCGATGCGCCCCCTGAGATGGTC    | 1155 |
| TaTOE1-B1-3 | CAAAAGGGATAAGAGCAGCCTTGGCCTGCAACTCCACCATGGATCATATGAAGGCTCTGAAGTAAAGAGACCAAAGGTCGATGCGCCCCCTGAGATGGTC    | 1155 |
| Consensus   | caaaagggataagagcagccttggcctgcaactccaccatggatcatatgaaggctctgaactaaagagaccaaaggctcgatgcgccccctgagatggtc   |      |
| TaTOE1-B1-1 | GCAATCCCTCATCGATACCCCTTCTGACCGAGCATCCACCAATCTGGCATGGCCAAATCATATCCCATCTTTTAAATATGAGATGCGAGATC            | 1300 |
| TaTOE1-B1-2 | GCAATCCCTCATCGATACCCCTTCTGACCGAGCATCCACCAATCTGGCATGGCCAAATCATATCCCATCTTTTAAATATGAGATGCGAGATC            | 1248 |
| TaTOE1-B1-3 | GCAATCCCTCATCGATACCCCTTCTGACCGAGCATCCACCAATCTGGCATGGCCAAATCATATCCCATCTTTTAAATATGAGATGCGAGATC            | 1255 |
| Consensus   | gcaatccctcatcgataccccccttgacccgagcatccaccaaatctggcatggccaaatcatatcccatcttttta                           |      |

**Figure S1.** Coding Sequence alignment of the three transcripts produced by *TaTOE1-B1* in this study. *TaTOE1-B1-1* (ID: TraesCS1B02G076300.1), *TaTOE1-B1-2* (ID: TraesCS1B02G076300.2) and *TaTOE1-B1-3* (ID: TraesCS1B02G076300.3); The red boxes show the locations of the 45bp (1219-1264) and 7bp (1603-1611) differential loci, respectively.

|                |                                                                                                           |     |
|----------------|-----------------------------------------------------------------------------------------------------------|-----|
| TaTOE1-B1-1    | MELDLNVEEKPAAVARSDSGTSESSVLNAEASCGGGAAPAEAEASSSTRQAPAPAPRAVLEFSILRSSASAEGENDVGADDDDEEATPSPPPPPTRHYHQHL    | 100 |
| TaTOE1-B1-2    | MELDLNVEEKPAAVARSDSGTSESSVLNAEASCGGGAAPAEAEASSSTRQAPAPAPRAVLEFSILRSSASAEGENDVGADDDDEEATPSPPPPPTRHYHQHL    | 100 |
| TaTOE1-B1-3    | MELDLNVEEKPAAVARSDSGTSESSVLNAEASCGGGAAPAEAEASSSTRQAPAPAPRAVLEFSILRSSASAEGENDVGADDDDEEATPSPPPPPTRHYHQHL    | 100 |
| Consensus      | meldlnveekpaavarstdsgtseessvlnaeascgggaapaeaeassstrqpapappravlefssilrssasaegendvgaddddeeatpsppppptrhyqhhl |     |
| TaTOE1-B1-1    | LQFQCLVTQELFPAATAGGPPPMSPVCHWAEIGFFRPAAPPPDMRILQMCCQLQVHACPPPPAAQPPVAKKSRGPRSRSSQYRGVTFYRRTGRWES          | 200 |
| TaTOE1-B1-2    | LQFQCLVTQELFPAATAGGPPPMSPVCHWAEIGFFRPAAPPPDMRILQMCCQLQVHACPPPPAAQPPVAKKSRGPRSRSSQYRGVTFYRRTGRWES          | 200 |
| TaTOE1-B1-3    | LQFQCLVTQELFPAATAGGPPPMSPVCHWAEIGFFRPAAPPPDMRILQMCCQLQVHACPPPPAAQPPVAKKSRGPRSRSSQYRGVTFYRRTGRWES          | 200 |
| Consensus      | lqpqqlvtqelfpaaataggpppmspvqhwaeligffrpaappppdmrilmqccqlqvhaqppppaaqppvakkrrgprsrssqyrgvtfyrtrgrwes       |     |
| AP2-Domain1    |                                                                                                           |     |
| TaTOE1-B1-1    | HIWDCGKQVYLGGFDTAHAARAYDRAAIKFRGVADINFNLSDYIDDMKQMKGLSKEEFVHVLRQSTGFSRGSSKYRGVTLHKCGRWEARMGQFLGKK         | 300 |
| TaTOE1-B1-2    | HIWDCGKQVYLGGFDTAHAARAYDRAAIKFRGVADINFNLSDYIDDMKQMKGLSKEEFVHVLRQSTGFSRGSSKYRGVTLHKCGRWEARMGQFLGKK         | 300 |
| TaTOE1-B1-3    | HIWDCGKQVYLGGFDTAHAARAYDRAAIKFRGVADINFNLSDYIDDMKQMKGLSKEEFVHVLRQSTGFSRGSSKYRGVTLHKCGRWEARMGQFLGKK         | 300 |
| Consensus      | hiwdcgkqvylggfdtahaaraaydraaikfrgvadinfnlsdyidmkmkglskkeefvhvllrqstgfsrgsskyrgvtlhcgrwearmgqflgkk         |     |
| AP2-Domain2    |                                                                                                           |     |
| TaTOE1-B1-1    | YIYLGLEDNEVEAARAYDKAAIKCNGREAVTNFEPSTYDAELLSEVAAEGADVLDNLISQPTSCSEKRDKSSSLGLQLHHGSYEGSELKRPKVDAPPENV      | 400 |
| TaTOE1-B1-2    | .....AYDKAAIKCNGREAVTNFEPSTYDAELLSEVAAEGADVLDNLISQPTSCSEKRDKSSSLGLQLHHGSYEGSELKRPKVDAPPENV                | 385 |
| TaTOE1-B1-3    | .....AYDKAAIKCNGREAVTNFEPSTYDAELLSEVAAEGADVLDNLISQPTSCSEKRDKSSSLGLQLHHGSYEGSELKRPKVDAPPENV                | 385 |
| Consensus      | aydkaaikcngreavtnfepstydaellsevaaegadvldnlisqptsqspkrdksslgqlhghgsyegselkrpkvdappenv                      |     |
| 15 amino acids |                                                                                                           |     |
| TaTOE1-B1-1    | AIPHRYPLLTEHPPIWHGQSYPIFLNNEAARDHSRRPEVATGGVPTNAWSVSHFPPTQPMFLFSSSSAAASSGFSKTAAPGAPSASFDFDPMAPS           | 500 |
| TaTOE1-B1-2    | AIPHRYPLLTEHPPIWHGQSYPIFLNNE.....PEIIAGGQRAIPQGVFCFEGHGV.....                                             | 434 |
| TaTOE1-B1-3    | AIPHRYPLLTEHPPIWHGQSYPIFLNNEAARDHSRRPEVATGGVPTNAWSVSHFPPTQPMFLFSSSSAAASSGFSKTAAPGAPSASFDFDPMAPS           | 485 |
| Consensus      | aiphryplltehppiwhgqsyfiflnnepeggwvps                                                                      |     |
| TaTOE1-B1-1    | SSSSNQHHHHP                                                                                               | 511 |
| TaTOE1-B1-2    | .....                                                                                                     | 434 |
| TaTOE1-B1-3    | SSSSNQHHHHP                                                                                               | 496 |
| Consensus      |                                                                                                           |     |

**Figure S2.** Protein sequence alignment of TaTOE1-B1-1, TaTOE1-B1-2 and TaTOE1-B1-3. The red box represents the first AP2 domain (185-246), and the yellow box represents the second (277-338); The blue line shows 15 different amino acid locations.

**Table S1.** Primers used in this study

| Primer name        | Sequences (5'-3')                                     |
|--------------------|-------------------------------------------------------|
| Clone-F            | ATGGAGCTGGATCTGAACGTGGAGGAG                           |
| Clone-R            | TTTTCAGCGGGGGTGGTGGTGGTG                              |
| pBI-CDs-F          | acgggggactctagag <u>ggatcc</u> ATGGAGCTGGATCTGAACGTGG |
| pBI-CDs-R          | cgatcggggaaattc <u>gagctc</u> TCAGCGGGGGTGGTGGTG      |
| FT-F               | CTGGAACAACCTTTGGCAAT                                  |
| FT-R               | AGCCACTCTCCCTCTGACAA                                  |
| CO-F               | ATTCTGCAAACCCACTTGCT                                  |
| CO-R               | CCTCCTTGGCATCCTTATCA                                  |
| FLC-F              | AGCCAAGAAGACCGAACTCA                                  |
| FLC-R              | GGAGATTTGTCCAGCAGGTG                                  |
| SOC1-F             | AATTCGCCAGCTCCAATATG                                  |
| SOC1-R             | CCTCGATTGAGCATGTTCTTA                                 |
| PP2A-F             | TAACGTGGCCAAAATGATGC                                  |
| PP2A-R             | GTTCTCCACAACCGCTTGGT                                  |
| Sub-F              | atctcgagctcaagctt <u>cgaa</u> ATGGAGCTGGATCTGAACGTGG  |
| Sub-R              | ccgtcgactgcagaattc <u>gaa</u> GCGGGGGTGGTGGTGGTG      |
| PGBKT7-F           | atggccatggaggccgaattcATGGAGCTGGATCTGAACGTGG           |
| PGBKT7-R           | atgcgccgctgcaggtc <u>gac</u> TCAGCGGGGGTGGTGGTG       |
| N-R                | atgcgccgctgcaggtc <u>gac</u> CGAGCTGCGGGAGCG          |
| N+Domain-R         | atgcgccgctgcaggtc <u>gac</u> ATCATAGGTGCTCGGCTC       |
| C-F                | atggccatggaggccgaattcATGGCGGAGCTGCTCAATG              |
| AD-TaTCP5-A1-F     | gccatggaggccagtgatcATGATAAGCGCCGCGAC                  |
| AD-TaTCP5-A1-R     | cagctcgagctcgatgagtcTCATCGATCAACCCTGGCTT              |
| AD-TaARF16-B1-F    | gccatggaggccagtgatcATGAAGGAGGTGGGCGAGG                |
| AD-TaARF16-B1-R    | cagctcgagctcgatgagtcTCACACCCGCTGAACCATG               |
| AD-TaSBP1-D6-F     | gccatggaggccagtgatcATGGCTGTGCAGGCCCAG                 |
| AD-TaSBP1-D6-R     | cagctcgagctcgatgagtcTCAACACAGGATGGCCTCCA              |
| AD-TaMYB85-D5-F    | gccatggaggccagtgatcATGGGGCGGCAGCCGTGC                 |
| AD-TaMYB85-D5-R    | cagctcgagctcgatgagtcCTAGAGATTTGATCCACTTGAGCTGT        |
| TaTOE1-B1-3-NYFP-F | atctcgagctcaagctt <u>cgaa</u> ATGGAGCTGGATCTGAACGTGG  |
| TaTOE1-B1-3-NYFP-R | ccgtcgactgcagaattc <u>gaa</u> GCGGGGGTGGTGGTGGTG      |
| TaARF16-B1-CYFP-F  | atctcgagctcaagctt <u>cgaa</u> ATGAAGGAGGTGGGCGAGG     |
| TaARF16-B1-CYFP-R  | ccgtcgactgcagaattc <u>gaa</u> TCACACCCGCTGAACCATG     |
| TaPIFI-CYFP-F      | atctcgagctcaagctt <u>cgaa</u> ATGGCCACCATCTCTTCTTGC   |
| TaPIFI-CYFP-R      | ccgtcgactgcagaattc <u>gaa</u> CTCCTCCGTATCAGAGTCCAGC  |

The lowercase letters indicate homologous arm sequences, and the underscores indicate the restriction site sequence.
